# Supplementary material for: Determination of intensity ratios of Nd, Cs, Zr and Sr against U and burn-up in simulated nuclear fuels by LA-ICPMS
Source: Royal Society of Chemistry journal article supplement (doi:10.1039/d1ja00293g), 2022-01-01
Supplement: d1ja00293g1.pdf [file d1ja00293g1.pdf]

ESI, Table 1. Amount of heavy element (U) and burn-up monitor (Nd) taken for the preparation target pellet (Set-I). The source of the starting materials are nuclear grade natural  $\text{UO}_2$  and  $\text{Nd}_2\text{O}_3$  (99.9% pure) obtained from M/s Indian Rare Earths, Mumbai, India.

| <b>S. No.</b> | <b>Sample ID</b> | <b>Calculated burn-up (at.%)</b> | <b><math>\text{UO}_2</math> (g)</b> | <b><math>\text{Nd}_2\text{O}_3</math> (g)</b> | <b>Atom ratio of <math>^{238}\text{U}/(^{145}\text{Nd}+^{146}\text{Nd})</math></b> |
|---------------|------------------|----------------------------------|-------------------------------------|-----------------------------------------------|------------------------------------------------------------------------------------|
| 1.            | S-I-1            | 0.79                             | 3.5311                              | 0.0038                                        | 2.3E+03                                                                            |
| 2.            | S-I-2            | 3.58                             | 3.5337                              | 0.0178                                        | 4.8E+02                                                                            |
| 3.            | S-I-3            | 6.83                             | 3.5386                              | 0.0352                                        | 2.4E+02                                                                            |
| 4.            | S-I-4            | 9.80                             | 3.5338                              | 0.0521                                        | 1.6E+02                                                                            |
| 5.            | S-I-5            | 12.54                            | 3.5377                              | 0.0688                                        | 1.2E+02                                                                            |
| 6.            | S-I-6            | 15.44                            | 3.5318                              | 0.0875                                        | 9.8E+01                                                                            |

ESI, Table 2. Amount of heavy element (U), burn-up monitor (Nd), and other major fission products (Cs, Zr and Sr) taken for the preparation target pellet (Set-II). The source of the starting materials are nuclear grade natural  $\text{UO}_2$ ;  $\text{Nd}_2\text{O}_3$  (99.9% pure) obtained from M/s Indian Rare Earths, Mumbai, India;  $\text{CsCl}$  (99.9% pure) and  $\text{ZrOCl}_2 \cdot 8\text{H}_2\text{O}$  (98% pure) procured from M/s. Sigma Aldrich Chemicals Pvt. Ltd., Bengaluru, India and  $\text{SrCO}_3$  (99.9% pure) obtained from M/s. Otto Chemie Pvt. Ltd., Mumbai, India.

| S. No. | Sample ID | Calculated burn-up (at.%) | $\text{UO}_2$ (g) | $\text{Nd}_2\text{O}_3$ (g) | $\text{ZrOCl}_2 \cdot 8\text{H}_2\text{O}$ (g) | $\text{CsCl}$ (g) | $\text{SrCO}_3$ (g) | Atom ratio of $^{238}\text{U}/(^{145}\text{Nd} + ^{146}\text{Nd})$ |
|--------|-----------|---------------------------|-------------------|-----------------------------|------------------------------------------------|-------------------|---------------------|--------------------------------------------------------------------|
| 1.     | S-II-1    | 0.73                      | 5.8817            | 0.0059                      | 0.0145                                         | 0.0104            | 0.0027              | 2.4E+03                                                            |
| 2.     | S-II-2    | 3.44                      | 5.8801            | 0.0284                      | 0.0695                                         | 0.032             | 0.0128              | 5.0E+02                                                            |
| 3.     | S-II-3    | 6.73                      | 5.9195            | 0.0579                      | 0.1399                                         | 0.0613            | 0.0258              | 2.5E+02                                                            |
| 4.     | S-II-4    | 9.91                      | 5.8959            | 0.088                       | 0.2100                                         | 0.1008            | 0.0384              | 1.6E+02                                                            |
| 5.     | S-II-5    | 12.63                     | 5.9050            | 0.1158                      | 0.2793                                         | 0.1236            | 0.0516              | 1.2E+02                                                            |
| 6.     | S-II-6    | 15.44                     | 5.8884            | 0.1458                      | 0.3489                                         | 0.1548            | 0.0642              | 9.8E+01                                                            |

ESI, Table 3. Details and optimized operating parameters for ICPMS (M/s. SPECTRO MS, Germany. Model: MSS001, 2015).

| <b>S. No.</b> | <b>ICPMS instrument parameters</b>      | <b>Description</b>                                                                              |
|---------------|-----------------------------------------|-------------------------------------------------------------------------------------------------|
| 1.            | Mass analyzer                           | Double focusing sector field in Mattauch-Herzog geometry                                        |
| 2.            | Mass resolution                         | 500-800 at $^{107}\text{Ag}$ and $^{208}\text{Pb}$                                              |
| 3.            | Sample introduction system              | Laser ablation (LA)                                                                             |
| 4.            | Length between LA cell & ICP            | ~ 1 m                                                                                           |
| 5.            | Plasma torch                            | Fixed quartz with platinum shield                                                               |
| 6.            | Cooling gas flow rate                   | 12 L/min                                                                                        |
| 7.            | Auxiliary gas flow rate                 | 2.3 L/min                                                                                       |
| 8.            | Carrier gas flow rate                   | 1.7 L/min                                                                                       |
| 9.            | RF-power                                | 1460 W                                                                                          |
| 10.           | Detector                                | Complementary metal oxide semiconductor active pixel direct charge detector array (CMOS-AP-DCD) |
| 11.           | Detector mass range                     | 6 to 238 amu (simultaneous measurement)                                                         |
| 12.           | Detector dynamic Range                  | > 8 order of magnitude                                                                          |
| 13.           | BaO <sup>+</sup> /Ba <sup>+</sup> ratio | ≤ 0.3 %                                                                                         |
| 14.           | Mass calibration                        | 20 ppb multi-element standard MERCK- VI solution                                                |
| 15.           | No. of measurements                     | 21 for each sample                                                                              |
| 16.           | Total integration time                  | 20 s                                                                                            |
| 17.           | Base interval                           | 10 ms                                                                                           |
| 18.           | Integration Mode                        | Threshold                                                                                       |
| 19.           | Measured isotopes                       | Relatively high abundance and non-interfering isotopes                                          |

ESI, Table 4. Details of the ArF (193 nm) excimer laser used.

| <b>S. No.</b> | <b>Laser system</b>            | <b>Description</b>                                 |
|---------------|--------------------------------|----------------------------------------------------|
| 1.            | Manufacturer and model         | M/s. ATL Lasertechnik GmbH, Germany; ATLEX SP300i. |
| 2.            | Pulse width                    | 4-6 ns                                             |
| 3.            | Repetition rate                | 10 Hz                                              |
| 4.            | Pulse energy used              | 2 mJ                                               |
| 5.            | Laser spot size                | 150 $\mu\text{m}$ x 150 $\mu\text{m}$              |
| 6.            | Energy fluence at focused spot | 1.3 J/cm <sup>2</sup>                              |
| 7.            | Target                         | Sintered pellet (as in Table 1 and 2)              |

ESI, Table 5. Details of the laser beam homogenizer used.

| <b>S. No.</b> | <b>LBH system</b>         | <b>Description</b>                                                                                                                                         |
|---------------|---------------------------|------------------------------------------------------------------------------------------------------------------------------------------------------------|
| 1.            | Manufacturer and model    | M/s. ATL Lasertechnik GmbH, Germany;<br>Light shot micro-machining system                                                                                  |
| 2.            | Beam homogenization       | Fourier lens in conjunction with an<br>engineered diffuser on motorized rotating<br>mount                                                                  |
| 3.            | Homogenization            | Both spatial and temporal                                                                                                                                  |
| 4.            | Mask                      | Stainless-steel sheet cut with 32 different<br>shapes with motorized positioning,<br>providing spot size 2 x 2 (micron) to 150 x<br>150 (micron) on sample |
| 5.            | Energy Control            | Motorized beam attenuator: 20-85%                                                                                                                          |
| 6.            | No of focal lens elements | 6                                                                                                                                                          |
| 7.            | Lens materials            | UV grade fused silica and CaF <sub>2</sub>                                                                                                                 |
| 8.            | Lens clear aperture       | ø 22 mm                                                                                                                                                    |
| 9.            | Useful aperture           | ø 20 mm                                                                                                                                                    |
| 10.           | Effective focal length    | 50-150 mm                                                                                                                                                  |
| 11.           | Demagnification           | 16/10 X                                                                                                                                                    |
| 12.           | UV optical resolution     | <1 µm                                                                                                                                                      |
| 13.           | UV Field                  | upto 1 x 1 mm                                                                                                                                              |
| 14.           | Focus                     | 0-50 mm                                                                                                                                                    |
| 15.           | Sample stage X, Y travel  | 100 x 100 mm                                                                                                                                               |
| 16.           | Positioning resolution    | 1 µm                                                                                                                                                       |
| 17.           | Positioning repeatability | <3 µm                                                                                                                                                      |
| 18.           | Positioning speed         | <25 mm/s                                                                                                                                                   |

ESI, Table 6. Atom ratio (AR) obtained from the weight composition [ESI Table 1-2] and measured intensity ratio (IR) of  $^{143}\text{Nd}/^{238}\text{U}$ ,  $(^{145}\text{Nd} + ^{146}\text{Nd})/^{238}\text{U}$ ,  $^{143}\text{Nd}/^{146}\text{Nd}$  by LA-ICPMS, the corresponding RSD and error for  $^{143}\text{Nd}/^{146}\text{Nd}$  implies the deviation from natural abundance ratio.

| S. No.                 | $^{143}\text{Nd}/^{238}\text{U}$ |      |                         | $(^{145}\text{Nd} + ^{146}\text{Nd})/^{238}\text{U}$ |       |         | $^{143}\text{Nd}/^{146}\text{Nd}$ |         |           |
|------------------------|----------------------------------|------|-------------------------|------------------------------------------------------|-------|---------|-----------------------------------|---------|-----------|
|                        | AR                               | IR   | RSD (%)                 | AR                                                   | IR    | RSD (%) | IR                                | RSD (%) | Error (%) |
| <b>Set-I pellets</b>   |                                  |      |                         |                                                      |       |         |                                   |         |           |
| 1                      | 2.12E-04                         | 0.27 | 0.7                     | 4.43E-04                                             | 0.58  | 0.9     | 0.707                             | 0.5     | 0.3       |
| 2                      | 9.92E-04                         | 1.75 | 0.3                     | 2.08E-03                                             | 3.62  | 0.4     | 0.710                             | 0.5     | 0.2       |
| 3                      | 1.96E-03                         | 3.55 | 0.8                     | 4.10E-03                                             | 7.55  | 0.8     | 0.709                             | 0.3     | 0.1       |
| 4                      | 2.90E-03                         | 5.32 | 0.2                     | 6.08E-03                                             | 11.33 | 0.2     | 0.711                             | 0.3     | 0.4       |
| 5                      | 3.83E-03                         | 6.99 | 0.2                     | 8.01E-03                                             | 14.97 | 0.1     | 0.707                             | 0.4     | 0.3       |
| 6                      | 4.88E-03                         | 8.99 | 0.4                     | 1.02E-02                                             | 19.15 | 0.4     | 0.709                             | 0.3     | 0.01      |
| Linear fit             |                                  |      |                         |                                                      |       |         |                                   |         |           |
| $y = (1832 \pm 9) * x$ |                                  |      | $y = (1866 \pm 11) * x$ |                                                      |       |         |                                   |         |           |
| $R^2 = 0.99997$        |                                  |      | $R^2 = 0.99998$         |                                                      |       |         |                                   |         |           |
| <b>Set-II pellets</b>  |                                  |      |                         |                                                      |       |         |                                   |         |           |
| 7                      | 1.98E-04                         | 0.27 | 0.9                     | 4.13E-04                                             | 0.59  | 0.7     | 0.707                             | 0.4     | 0.2       |
| 8                      | 9.51E-04                         | 1.72 | 0.5                     | 1.99E-03                                             | 3.67  | 0.9     | 0.709                             | 0.4     | 0.1       |
| 9                      | 1.93E-03                         | 3.54 | 0.6                     | 4.03E-03                                             | 7.52  | 0.6     | 0.711                             | 0.5     | 0.3       |
| 10                     | 2.94E-03                         | 5.35 | 0.6                     | 6.15E-03                                             | 11.47 | 0.3     | 0.709                             | 0.2     | 0.1       |
| 11                     | 3.86E-03                         | 7.11 | 0.4                     | 8.08E-03                                             | 15.12 | 0.2     | 0.706                             | 0.3     | 0.4       |
| 12                     | 4.88E-03                         | 9.01 | 0.3                     | 1.02E-02                                             | 19.20 | 0.5     | 0.708                             | 0.2     | 0.1       |
| Linear fit             |                                  |      |                         |                                                      |       |         |                                   |         |           |
| $y = (1839 \pm 7) * x$ |                                  |      | $y = (1874 \pm 7) * x$  |                                                      |       |         |                                   |         |           |
| $R^2 = 0.99993$        |                                  |      | $R^2 = 0.99996$         |                                                      |       |         |                                   |         |           |

ESI, Table 7. Atom ratio (AR) obtained from the weight composition [ESI Table 2] and measured intensity ratio (IR) of  $^{133}\text{Cs}/^{238}\text{U}$ ,  $^{90}\text{Zr}/^{238}\text{U}$  and  $^{88}\text{Sr}/^{238}\text{U}$  by LA-ICPMS for Set-II pellets and the corresponding RSD value.

| S. No.                 | $^{133}\text{Cs}/^{238}\text{U}$ |      |                       | $^{90}\text{Zr}/^{238}\text{U}$ |      |                       | $^{88}\text{Sr}/^{238}\text{U}$ |      |         |
|------------------------|----------------------------------|------|-----------------------|---------------------------------|------|-----------------------|---------------------------------|------|---------|
|                        | AR                               | IR   | RSD (%)               | AR                              | IR   | RSD (%)               | AR                              | IR   | RSD (%) |
| <b>Set-II pellets</b>  |                                  |      |                       |                                 |      |                       |                                 |      |         |
| 1                      | 2.86E-03                         | 0.08 | 0.9                   | 1.07E-03                        | 0.30 | 0.8                   | 6.98E-04                        | 0.22 | 0.7     |
| 2                      | 8.79E-03                         | 0.25 | 0.8                   | 5.13E-03                        | 1.60 | 0.5                   | 3.31E-03                        | 1.22 | 0.4     |
| 3                      | 1.67E-02                         | 0.51 | 0.6                   | 1.03E-02                        | 3.19 | 0.3                   | 6.63E-03                        | 2.49 | 0.3     |
| 4                      | 2.76E-02                         | 0.84 | 0.6                   | 1.55E-02                        | 4.83 | 0.6                   | 9.91E-03                        | 3.71 | 0.2     |
| 5                      | 3.38E-02                         | 1.04 | 0.4                   | 2.05E-02                        | 6.41 | 0.3                   | 1.33E-02                        | 5.05 | 0.2     |
| 6                      | 4.25E-02                         | 1.31 | 0.3                   | 2.57E-02                        | 8.12 | 0.2                   | 1.66E-02                        | 6.26 | 0.6     |
| Linear fit             |                                  |      |                       |                                 |      |                       |                                 |      |         |
| $y = (31 \pm 0.1) * x$ |                                  |      | $y = (314 \pm 1) * x$ |                                 |      | $y = (377 \pm 1) * x$ |                                 |      |         |
| $R^2 = 0.99992$        |                                  |      | $R^2 = 0.99994$       |                                 |      | $R^2 = 0.99993$       |                                 |      |         |

ESI, Table 8. Measured intensity ratio (IR) of  $^{143}\text{Nd}/^{238}\text{U}$ ,  $(^{145}\text{Nd} + ^{146}\text{Nd})/^{238}\text{U}$ ,  $^{143}\text{Nd}/^{146}\text{Nd}$  by LA-ICPMS for S-I-3 pellet [ESI Table 1], the corresponding RSD and error (for  $^{143}\text{Nd}/^{238}\text{U}$  and  $(^{145}\text{Nd} + ^{146}\text{Nd})/^{238}\text{U}$  error implies the deviation from the mean value; for  $^{143}\text{Nd}/^{146}\text{Nd}$  error implies the deviation from natural abundance ratio).

| S. No. | No. of laser spots | $^{143}\text{Nd}/^{238}\text{U}$ |         |           | $(^{145}\text{Nd} + ^{146}\text{Nd})/^{238}\text{U}$ |     |           | $^{143}\text{Nd}/^{146}\text{Nd}$ |         |           |
|--------|--------------------|----------------------------------|---------|-----------|------------------------------------------------------|-----|-----------|-----------------------------------|---------|-----------|
|        |                    | IR                               | RSD (%) | Error (%) | IR                                                   | RSD | Error (%) | IR                                | RSD (%) | Error (%) |
| 1      | 1                  | 3.5                              | 0.5     | 0.6       | 7.5                                                  | 0.4 | 0.5       | 0.710                             | 0.3     | 0.1       |
| 2      | 2                  | 3.5                              | 0.3     | 0.3       | 7.5                                                  | 0.5 | 0.4       | 0.709                             | 0.3     | 0.1       |
| 3      | 3                  | 3.5                              | 0.7     | 0.1       | 7.5                                                  | 0.4 | 0.2       | 0.709                             | 0.4     | 0.03      |
| 4      | 4                  | 3.6                              | 0.4     | 0.4       | 7.6                                                  | 0.7 | 0.7       | 0.706                             | 0.2     | 0.3       |
| 5      | 5                  | 3.5                              | 0.5     | 0.8       | 7.5                                                  | 0.3 | 0.5       | 0.708                             | 0.2     | 0.1       |
| 6      | 6                  | 3.5                              | 0.4     | 0.7       | 7.5                                                  | 0.7 | 0.2       | 0.706                             | 0.1     | 0.4       |
| 7      | 7                  | 3.5                              | 0.7     | 0.1       | 7.6                                                  | 0.2 | 0.4       | 0.710                             | 0.4     | 0.2       |
| 8      | 8                  | 3.5                              | 0.5     | 0.1       | 7.5                                                  | 0.4 | 0.4       | 0.708                             | 0.1     | 0.1       |
| 9      | 9                  | 3.5                              | 0.5     | 0.5       | 7.5                                                  | 0.5 | 0.5       | 0.709                             | 0.3     | 0.03      |
| 10     | 10                 | 3.6                              | 0.7     | 0.8       | 7.6                                                  | 0.4 | 0.8       | 0.706                             | 0.2     | 0.4       |
| 11     | 11                 | 3.6                              | 0.5     | 0.9       | 7.6                                                  | 0.3 | 0.7       | 0.710                             | 0.2     | 0.3       |
| 12     | 12                 | 3.6                              | 0.5     | 0.5       | 7.6                                                  | 0.4 | 0.2       | 0.708                             | 0.1     | 0.02      |
| 13     | 13                 | 3.5                              | 0.6     | 0.6       | 7.5                                                  | 0.5 | 0.6       | 0.709                             | 0.2     | 0.1       |
| 14     | 14                 | 3.6                              | 0.7     | 0.5       | 7.6                                                  | 0.5 | 0.6       | 0.712                             | 0.4     | 0.4       |
| 15     | <x>                | 3.5                              |         |           | 7.5                                                  |     |           | 0.709                             |         |           |
| 16     | <b>RSD</b>         | 0.6                              |         |           | 0.5                                                  |     |           | 0.24                              |         |           |



ESI, Table 9. Atom ratio (AR) obtained from the weight composition [ESI Table 1] and measured intensity ratio (IR) of  $^{143}\text{Nd}/^{238}\text{U}$ ,  $(^{145}\text{Nd} + ^{146}\text{Nd})/^{238}\text{U}$ ,  $^{143}\text{Nd}/^{146}\text{Nd}$  by liquid sampling ICPMS, the corresponding RSD and error for  $^{143}\text{Nd}/^{146}\text{Nd}$  implies the deviation from natural abundance ratio.

| S. No.                                      | $^{143}\text{Nd}/^{238}\text{U}$ |      |         | $(^{145}\text{Nd} + ^{146}\text{Nd})/^{238}\text{U}$ |      |         | $^{143}\text{Nd}/^{146}\text{Nd}$ |         |           |
|---------------------------------------------|----------------------------------|------|---------|------------------------------------------------------|------|---------|-----------------------------------|---------|-----------|
|                                             | AR                               | IR   | RSD (%) | AR                                                   | IR   | RSD (%) | IR                                | RSD (%) | Error (%) |
| <b>Set-I pellets, Liquid sampling ICPMS</b> |                                  |      |         |                                                      |      |         |                                   |         |           |
| 1                                           | 2.12E-04                         | 0.08 | 0.8     | 4.43E-04                                             | 0.18 | 0.6     | 0.708                             | 0.5     | 0.1       |
| 2                                           | 9.92E-04                         | 0.40 | 0.9     | 2.08E-03                                             | 0.82 | 0.9     | 0.709                             | 0.2     | 0.1       |
| 3                                           | 1.96E-03                         | 0.80 | 0.4     | 4.10E-03                                             | 1.72 | 0.3     | 0.706                             | 0.4     | 0.3       |
| 4                                           | 2.90E-03                         | 1.21 | 0.5     | 6.08E-03                                             | 2.52 | 0.7     | 0.710                             | 0.3     | 0.2       |
| 5                                           | 3.83E-03                         | 1.59 | 0.3     | 8.01E-03                                             | 3.35 | 0.2     | 0.707                             | 0.2     | 0.2       |
| 6                                           | 4.88E-03                         | 2.03 | 0.2     | 1.02E-02                                             | 4.31 | 0.3     | 0.711                             | 0.3     | 0.3       |
| Linear fit                                  |                                  |      |         |                                                      |      |         |                                   |         |           |
| $y = (415 \pm 1) * x$                       |                                  |      |         | $y = (420 \pm 1) * x$                                |      |         |                                   |         |           |
| $R^2 = 0.99993$                             |                                  |      |         | $R^2 = 0.99994$                                      |      |         |                                   |         |           |

ESI, Table 10. AR determined from calibration plot of liquid ICPMS and measured IR by LA-ICPMS for  $^{143}\text{Nd}/^{238}\text{U}$  and  $(^{145}\text{Nd} + ^{146}\text{Nd})/^{238}\text{U}$ .

| S. No.                 | $^{143}\text{Nd}/^{238}\text{U}$ |      |                        | $(^{145}\text{Nd} + ^{146}\text{Nd})/^{238}\text{U}$ |       |         |
|------------------------|----------------------------------|------|------------------------|------------------------------------------------------|-------|---------|
|                        | AR                               | IR   | RSD (%)                | AR                                                   | IR    | RSD (%) |
| <b>Set-I pellets</b>   |                                  |      |                        |                                                      |       |         |
| 1                      | $(1.99 \pm 0.02)*\text{E-04}$    | 0.27 | 0.7                    | $(4.25 \pm 0.03)*\text{E-04}$                        | 0.58  | 0.9     |
| 2                      | $(9.67 \pm 0.09)*\text{E-04}$    | 1.75 | 0.3                    | $(1.95 \pm 0.17)*\text{E-03}$                        | 3.62  | 0.4     |
| 3                      | $(1.92 \pm 0.08)*\text{E-03}$    | 3.55 | 0.8                    | $(4.10 \pm 0.13)*\text{E-03}$                        | 7.55  | 0.8     |
| 4                      | $(2.91 \pm 0.16)*\text{E-03}$    | 5.32 | 0.2                    | $(6.01 \pm 0.44)*\text{E-03}$                        | 11.33 | 0.2     |
| 5                      | $(3.83 \pm 0.12)*\text{E-03}$    | 6.99 | 0.2                    | $(7.97 \pm 0.16)*\text{E-03}$                        | 14.97 | 0.1     |
| 6                      | $(4.89 \pm 0.10)*\text{E-03}$    | 8.99 | 0.4                    | $(1.03 \pm 0.34)*\text{E-02}$                        | 19.15 | 0.4     |
| Linear fit             |                                  |      |                        |                                                      |       |         |
| $y = (1833 \pm 7) * x$ |                                  |      | $y = (1870 \pm 8) * x$ |                                                      |       |         |
| $R^2 = 0.9999$         |                                  |      | $R^2 = 0.9998$         |                                                      |       |         |

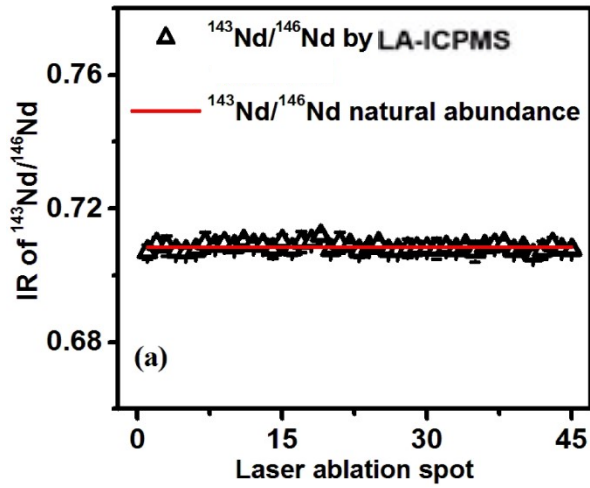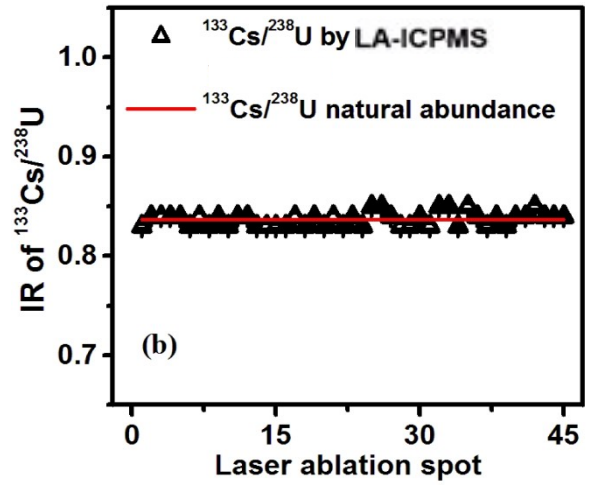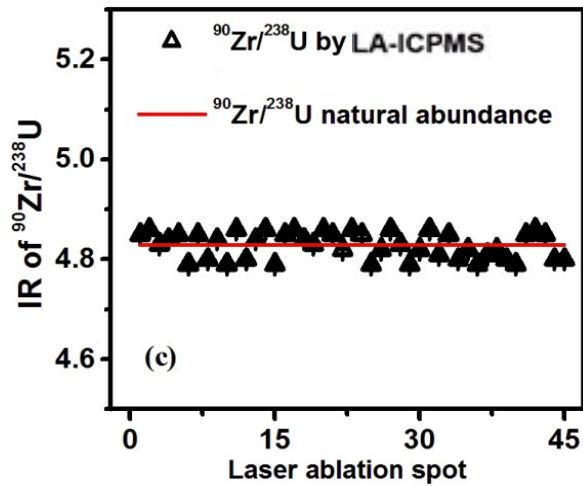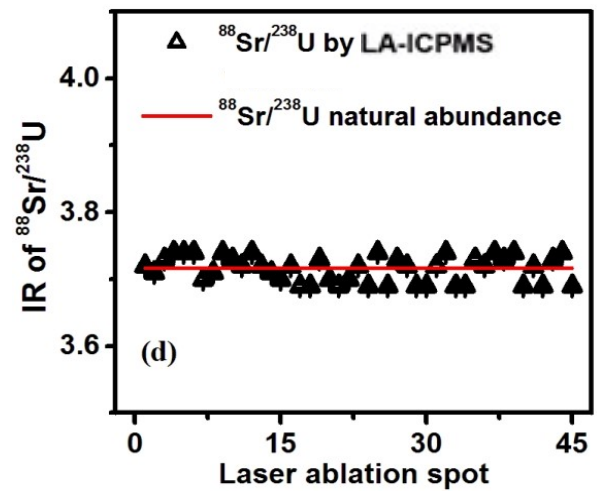

ESI, Figure 1. Plot of intensity ratios (IR) obtained for Set-II-4 pellet [ESI Table 2] using LA-ICPMS - (a)  $^{143}\text{Nd}/^{146}\text{Nd}$ ; (b)  $^{133}\text{Cs}/^{238}\text{U}$ ; (c)  $^{90}\text{Zr}/^{238}\text{U}$  and (d)  $^{88}\text{Sr}/^{238}\text{U}$ , against different laser ablation spots on the target pellet; the corresponding natural abundance ratio is indicated as a line.
